# Supplementary material
Source: MDPI journal article supplement (https://www.mdpi.com/2073-4441/15/17/3117)
Supplement: s1 [file s1]

## Sheet: Dataset S1
Dataset S1. Information on DNA sequences of freshwater mussels (Unionidae) used to reconstruct multi-locus phylogenies (one haplotype per species)
Taxon	Locality	Drainage basin	Tectonic block	Specimen Voucher	COI	16S rRNA	28S rRNA	References
IN-GROUP TAXA (GONIDEINAE: PSEUDODONTINI)
Bineurus anodontinum (Rochebrune, 1882)	Cambodia: Tonle Sekong River, Mekong River basin	Mekong	Sunda Plate	UF 507391 (ICH-00445)	MW603639	n/a	n/a	Konopleva et al. [1]
Bineurus exilis (Morelet, 1866)	Thailand: upstream of the upper reservoir of the Mun River, Mekong River basin	Mekong	Sunda Plate	RMBH biv0474_1	MN275052	MN307243	MN307184	Bolotov et al. [2]
Bineurus loeiensis Konopleva et al., 2021	Thailand: Loei River, Mekong River basin	Mekong	Sunda Plate	RMBH biv0119_1	KX865879	KX865650	KX865750	Bolotov et al. [3]
Bineurus mouhotii (Lea, 1863)	Laos: Nam Pe River, Mekong River basin	Mekong	Sunda Plate	RMBH biv0183_4	KX865877	KX865648	KX865748	Bolotov et al. [3]
Indopseudodon bogani (Bolotov, Kondakov & Konopleva, 2017) comb. nov.	Myanmar: Kanni River, Sittaung River basin	Sittaung	Burma Terrane	RMBH biv0241_4	MF352216	MF352290	MF352348	Bolotov et al. [4]
Indopseudodon crebristriatus (Anthony, 1865) comb. nov.	Myanmar: Bago River	Bago	Burma Terrane	RMBH biv0986_1	OQ836319	OQ832397	OQ832361	This study
Indopseudodon indawgyiensissp. nov. [Irrawaddy lineage]	Myanmar: an unnamed tributary of Lake Indawgyi, Ayeyarwady River basin	Ayeyarwady	Burma Terrane	RMBH biv0110_10	KX865858	KX865629	KX865730	Bolotov et al. [3]
Indopseudodon indawgyiensissp. nov. [Chindwin lineage]	Myanmar: Lamon Chaung, Chindwin River basin	Ayeyarwady	Burma Terrane	RMBH biv0896_1	OQ836303	OQ832392	OQ832356	This study
Indopseudodon kayinensis (Bolotov et al., 2020) comb. nov.	Myanmar: Winyaw River, Ataran River basin	Salween	Sunda Plate	RMBH biv0618_3	MN275045	MN307240	MN307181	Bolotov et al. [2]
Indopseudodon salwenianus (Gould, 1844) comb. rev.	Myanmar: Hlaingbwe Stream, Salween River basin	Salween	Sunda Plate	RMBH biv0674_1	MN275040	MN307238	MN307179	Bolotov et al. [2]
Indopseudodon salwenianus (Gould, 1844) comb. rev. [=Monocondylaea avae Theobald, 1873 syn. nov.]	Myanmar: Nga Wun River, Ayeyarwady River basin	Ayeyarwady	Burma Terrane	RMBH biv0670	OQ836224	OQ832369	OQ832333	This study
Namkongnaia inkhavilayi Jeratthitikul et al., 2021	Laos: local market near Xe Bangfai River, Mekong River Basin	Mekong	Sunda Plate	MUMNH UNI2831	MZ822395	MZ822895	MZ822917	Jeratthitikul et al. [5]
Namkongnaia lemeslei (Morelet, 1875)	Cambodia: Kampong Kdei River, Tonle Sap Basin	Mekong	Sunda Plate	MUMNH UNI2825	MZ822399	MZ822899	MZ822921	Jeratthitikul et al. [5]
Nyeinchanconcha nyeinchani Bolotov et al., 2020	Laos: Nam Phiat River, Mekong River basin	Mekong	Sunda Plate	RMBH biv0829_2	OQ836238	OQ832374	OQ832338	This study
Pilsbryoconcha acuta Jeratthitikul & Prasankok, 2022	Laos: Tomotha Stream, Mekong River basin	Mekong	Sunda Plate	RMBH biv0874_1	OQ836279	OQ832385	OQ832349	This study
Pilsbryoconcha carinifera (Conrad, 1837)	Cambodia	Mekong	Sunda Plate	UMMZ 304647	KP795024	KP795049	KP795007	Pfeiffer & Graf [6]
Pilsbryoconcha exilis (Lea, 1838)	Thailand: Huai Nam Khu Reservoir, Mekong River basin	Mekong	Sunda Plate	RMBH biv0118	KX865875	KX865646	KX865746	Bolotov et al. [3]
Pilsbryoconcha hoikaab Jeratthitikul & Prasankok, 2022	Laos: Nam Sanam River, Mekong River basin	Mekong	Sunda Plate	RMBH biv0842_1	OQ836250	OQ832376	OQ832340	This study
Pilsbryoconcha kittitati Jeratthitikul & Prasankok, 2022	Thailand: Korat Plateau Basin, Udon Thani, Wang Sam Mo, unnamed pond	Mekong	Sunda Plate	MUMNH UNI0374	OP589118	OP595949	OP595878	Jeratthitikul et al. [7]
Pilsbryoconcha linguaeformis (Morelet, 1875)	Cambodia: Boeng Tonle Chhma, Tonle Sap Lake, Mekong River basin	Mekong	Sunda Plate	MUMNH UNI2625	MZ822413	MZ822913	MZ822935	Jeratthitikul et al. [5]
Pilsbryoconcha mekongiana Jeratthitikul & Prasankok, 2022	Laos: Nam Kadan Stream, Mekong River basin	Mekong	Sunda Plate	RMBH biv0828_1	OQ836235	OQ832372	OQ832336	This study
Pilsbryoconcha schomburgki (Martens, 1860)	Thailand: Old main Tapi River, TRB, Ban Kra Chum, Tambon Arun-Kama-Wari, Kiansa District, Surat Thani Province	Thai-Malay Peninsula	Sunda Plate	RMBH biv1284_1	OP729824	OP735380	OP735365	Konopleva et al. [8]
Pseudodon cambodjensis (Petit de la Saussaye, 1865) comb. rev.	Laos: Nam Ngum River, Mekong River basin	Mekong	Sunda Plate	RMBH biv0811_1	OQ836225	OQ832370	OQ832334	This study
Pseudodon inoscularis (Gould, 1844)	Myanmar: Yae Pone Stream near Yae Pone village, Dawei (Tavoy) River basin	Dawei	Sunda Plate	RMBH biv1027_1	OQ836329	OQ832401	OQ832365	This study
Pseudodon lenyanensis (Bolotov et al., 2020) comb. nov.	Myanmar: 14 Mile Stream, Lenya River basin	Lenya	Sunda Plate	RMBH biv0628_1	MN275054	MN307245	MN307186	Bolotov et al. [2]
Pseudodon mekongi (Bolotov et al., 2020) comb. nov.	Thailand: Phong River, Mekong River basin	Mekong	Sunda Plate	RMBH biv0122	KX865861	KX865632	KX865733	Bolotov et al. [3]
Pseudodon vagulus (Fischer, 1891) comb. rev. [=P. cambodjensis sensu Pfeiffer & Graf, 2015]	Cambodia: Pursat River, a tributary of Tonle Sap River, Mekong River basin	Mekong	Sunda Plate	UMMZ 304350	KP795028	KF011262	KP795011	Pfeiffer & Graf [6]
Pseudodon vondembuschianus laosica (Bolotov et al., 2020) comb. nov.	Laos: a tributary of the Vang Ngao River, Mekong River basin	Mekong	Sunda Plate	UMMZ 304650	KP795029	KP795052	n/a	Pfeiffer & Graf [6]
Pseudodon vondembuschianus tapienica Konopleva et al., 2023	Thailand: Main Klong Min, TRB, Tambon Kaew San, Nabon District, Nakhon Si Thammarat Province	Thai-Malay Peninsula	Sunda Plate	RMBH biv1272_2	OP729819	OP735378	OP735361	Konopleva et al. [8]
Pseudodon vondembuschianus thasaenica Konopleva et al., 2023	Thailand: Main Klong Thasae, Tha Taphao River Basin, nearby Wat Na Srang, Thasae District, Chumphon Province	Thai-Malay Peninsula	Sunda Plate	RMBH biv1321_1	OP729822	OP735379	OP735364	Konopleva et al. [8]
Pseudodon vondembuschianus vondembuschianus(Lea, 1840) comb. rev.	Malaysia	Thai-Malay Peninsula	Sunda Plate	BIV1721	KX051296	n/a	n/a	Zieritz et al. [9]
Songkhlanaia tamodienica Konopleva et al., 2023	Thailand: Klong Plug Pom, middle reach of Klong Tamod, SLB, Ban Kok Sai, Tambon Mae Kree, Tamod District, Phatthalung Province	Thai-Malay Peninsula	Sunda Plate	RMBH biv1332	OP729832	OP735386	OP735369	Konopleva et al. [8]
Sundadontina brandti Bolotov et al., 2020	Thailand: Mun River, Mekong River basin	Mekong	Sunda Plate	RMBH biv0475_2	MN275058	MN307249	MN307190	Bolotov et al. [2]
Sundadontina cumingii (Lea, 1850)	Malaysia	Thai-Malay Peninsula	Sunda Plate	X115	KX051295	n/a	n/a	Zieritz et al. [9]
Sundadontina harmandi (Crosse & Fischer, 1876)	Laos: Huay Tuay River, Mekong River basin	Mekong	Sunda Plate	RMBH biv0881_1	OQ836287	OQ832387	OQ832351	This study
Sundadontina plugpomenica Konopleva et al., 2023	Thailand: Klong Pa-Payom, SLB, Ban Teng, tambon Laem Tanod, Khuan Kanun District, Phatthalung Province	Thai-Malay Peninsula	Sunda Plate	RMBH biv_1324_3	OP729830	OP735384	OP735368	Konopleva et al. [8]
Sundadontina sulcata (Rochebrune, 1881)	Laos: Phaphou Stream, Mekong River basin	Mekong	Sunda Plate	RMBH biv0869_1	OQ836273	OQ832381	OQ832345	This study
Sundadontina tanintharyiensis Bolotov et al., 2020	Myanmar: Chaung Nauk Pyan Stream, Lenya River basin	Lenya	Sunda Plate	RMBH biv0643_4	MN275057	MN307248	MN307189	Bolotov et al. [2]
Sundadontina sp. 'Lenya'	Myanmar: Pa Yar Htan Stream, Lenya River basin	Lenya	Sunda Plate	RMBH biv1020_1	OQ836324	OQ832400	OQ832364	This study
Sundadontina taskaevi Bolotov et al., 2020	Thailand: Mun River, Mekong River basin	Mekong	Sunda Plate	RMBH biv0475_1	MN275061	MN307251	MN307192	Bolotov et al. [2]
Sundadontina tumida (Morelet, 1866)	Cambodia: Mekong River basin	Mekong	Sunda Plate	UMMZ 304349	KP795027	KF011261	KP795010	Pfeiffer & Graf [6]
Thaiconcha callifera (Martens, 1860)	Thailand: Phong River, Mekong River basin	Mekong	Sunda Plate	RMBH biv0120_4	KX865862	KX865633	KX865734	Bolotov et al. [3]
Thaiconcha munelliptica Konopleva et al., 2021	Thailand: Mun River, Mekong River basin	Mekong	Sunda Plate	RMBH biv0462	MN275063	MN307252	MN307193	Bolotov et al. [2]
Thaiconcha thaiensis Konopleva et al., 2021	Thailand: Kham Nong Bua River, Mekong River basin	Mekong	Sunda Plate	UF 567706 (2014-0700)	MW603630	n/a	MW647150	Konopleva et al. [1]
OUTGROUP TAXA (GONIDEINAE: CONTRADENTINI)
Yaukthwa elongatula Bolotov et al., 2019	Myanmar: Chindwin River	Ayeyarwady	Burma Terrane	RMBH biv0346_2	MK372407	MK372455	MK372485	Bolotov et al. [10]
Yaukthwa nesemanni (Konopleva, Vikhrev & Bolotov, 2017)	Myanmar: Tauk Ue Kupt River, Sittaung River basin	Sittaung	Burma Terrane	RMBH biv0144_14	KX865906	KX865663	KX865777	Bolotov et al. [3]
Trapezoideus mitanensis Bolotov et al., 2022	Myanmar: Mitan Stream, Haungthayaw River basin	Salween	Sunda Plate	RMBH biv1021_1	OL597613	ON142670	ON171238	Bolotov et al. [11]
Supplementary References
1. Konopleva, E.S.; Bolotov, I.N.; Pfeiffer, J.M.; Vikhrev, I.V.; Kondakov, A.V.; Gofarov, M.Y.; Tomilova, A.A.; Tanmuangpak, K.; Tumpeesuwan, S. New freshwater mussels from two Southeast Asian genera Bineurus and Thaiconcha (Pseudodontini, Gonideinae, Unionidae). Sci. Rep. 2021, 11, 8244.
2. Bolotov, I.N.; Konopleva, E.S.; Vikhrev, I.V.; Gofarov, M.Y.; Lopes-Lima, M.; Bogan, A.E.; Zau Lunn; Nyein Chan; Win, T.; Aksenova, O.V.; et al. New freshwater mussel taxa discoveries clarify biogeographic division of Southeast Asia. Sci. Rep. 2020, 10, 6616.
3. Bolotov, I.N.; Kondakov, A.V.; Vikhrev, I.V.; Aksenova, O.V.; Bespalaya, Y.V.; Gofarov, M.Y.; Kolosova, Y.S.; Konopleva, E.S.; Spitsyn, V.M.; Tanmuangpak, K.; et al. Ancient river inference explains exceptional Oriental freshwater mussel radiations. Sci. Rep. 2017, 7, 2135.
4. Bolotov, I.N.; Vikhrev, I.V.; Kondakov, A.V.; Konopleva, E.S.; Gofarov, M.Y.; Aksenova, O.V.; Tumpeesuwan, S. New taxa of freshwater mussels (Unionidae) from a species-rich but overlooked evolutionary hotspot in Southeast Asia. Sci. Rep. 2017, 7, 11573.
5. Jeratthitikul, E.; Sutcharit, C.; Ngor, P.B.; Prasankok, P. Molecular phylogeny reveals a new genus of freshwater mussels from the Mekong River Basin (Bivalvia: Unionidae). Eur. J. Taxon. 2021, 775, 119–142.
6. Pfeiffer, J.M.; Graf, D.L. Evolution of bilaterally asymmetrical larvae in freshwater mussels (Bivalvia: Unionoida: Unionidae). Zool. J. Linn. Soc. 2015, 175, 307–318.
7. Jeratthitikul, E.; Paphatmethin, S.; Sutcharit, C.; Ngor, P.B.; Inkhavilay, K.; Prasankok, P. Phylogeny and biogeography of Indochinese freshwater mussels in the genus Pilsbryoconcha Simpson, 1900 (Bivalvia: Unionidae) with descriptions of four new species. Sci. Rep. 2022, 12, 20458.
8. Konopleva, E.S.; Lheknim, V.; Sriwoon, R.; Kondakov, A.V.; Tomilova, A.A.; Gofarov, M.Y.; Vikhrev, I.V.; Bolotov, I.N. Diversity and Phylogenetics of Freshwater Mussels (Unionidae) from Southern Thailand with the Description of One New Genus and Five New Species-Group Taxa. Diversity 2023, 15, 10.
9. Zieritz, A.; Lopes-Lima, M.; Bogan, A.E.; Sousa, R.; Walton, S.; Rahim, K.A.A.; Wilson, J.J.; Ng, P.Y.; Froufe, E.; McGowan, S. Factors driving changes in freshwater mussel (Bivalvia, Unionida) diversity and distribution in Peninsular Malaysia. Sci. Total Environ. 2016, 571, 1069–1078.
10. Bolotov, I.N.; Konopleva, E. S.; Vikhrev, I. V.; Lopes-Lima, M.; Bogan, A. E.; Zau Lunn; Nyein Chan; Than Win; Aksenova, O. V.; Gofarov, M. Y.; et al. Eight new freshwater mussels (Unionidae) from tropical Asia. Sci. Rep. 2019, 9, 12053.
11. Bolotov, I.N.; Konopleva, E.S.; Vikhrev, I.V.; Win, T.; Lunn, Z.; Chan, N.; Gofarov, M.Y.; Kondakov, A.V.; Tomilova, A.A.; Pasupuleti, R.; et al. Follow the Footsteps of Leonardo Fea: An Example of an Integrative Revision of Freshwater Mussel Taxa Described from the Former British Burma (Myanmar). J. Zool. Syst. Evol. Res. 2022, 2022, 6600359.
