# Supplementary material
Source: MDPI journal article supplement (https://www.mdpi.com/2073-4441/15/17/3117)
Supplement: s1 [file s1]

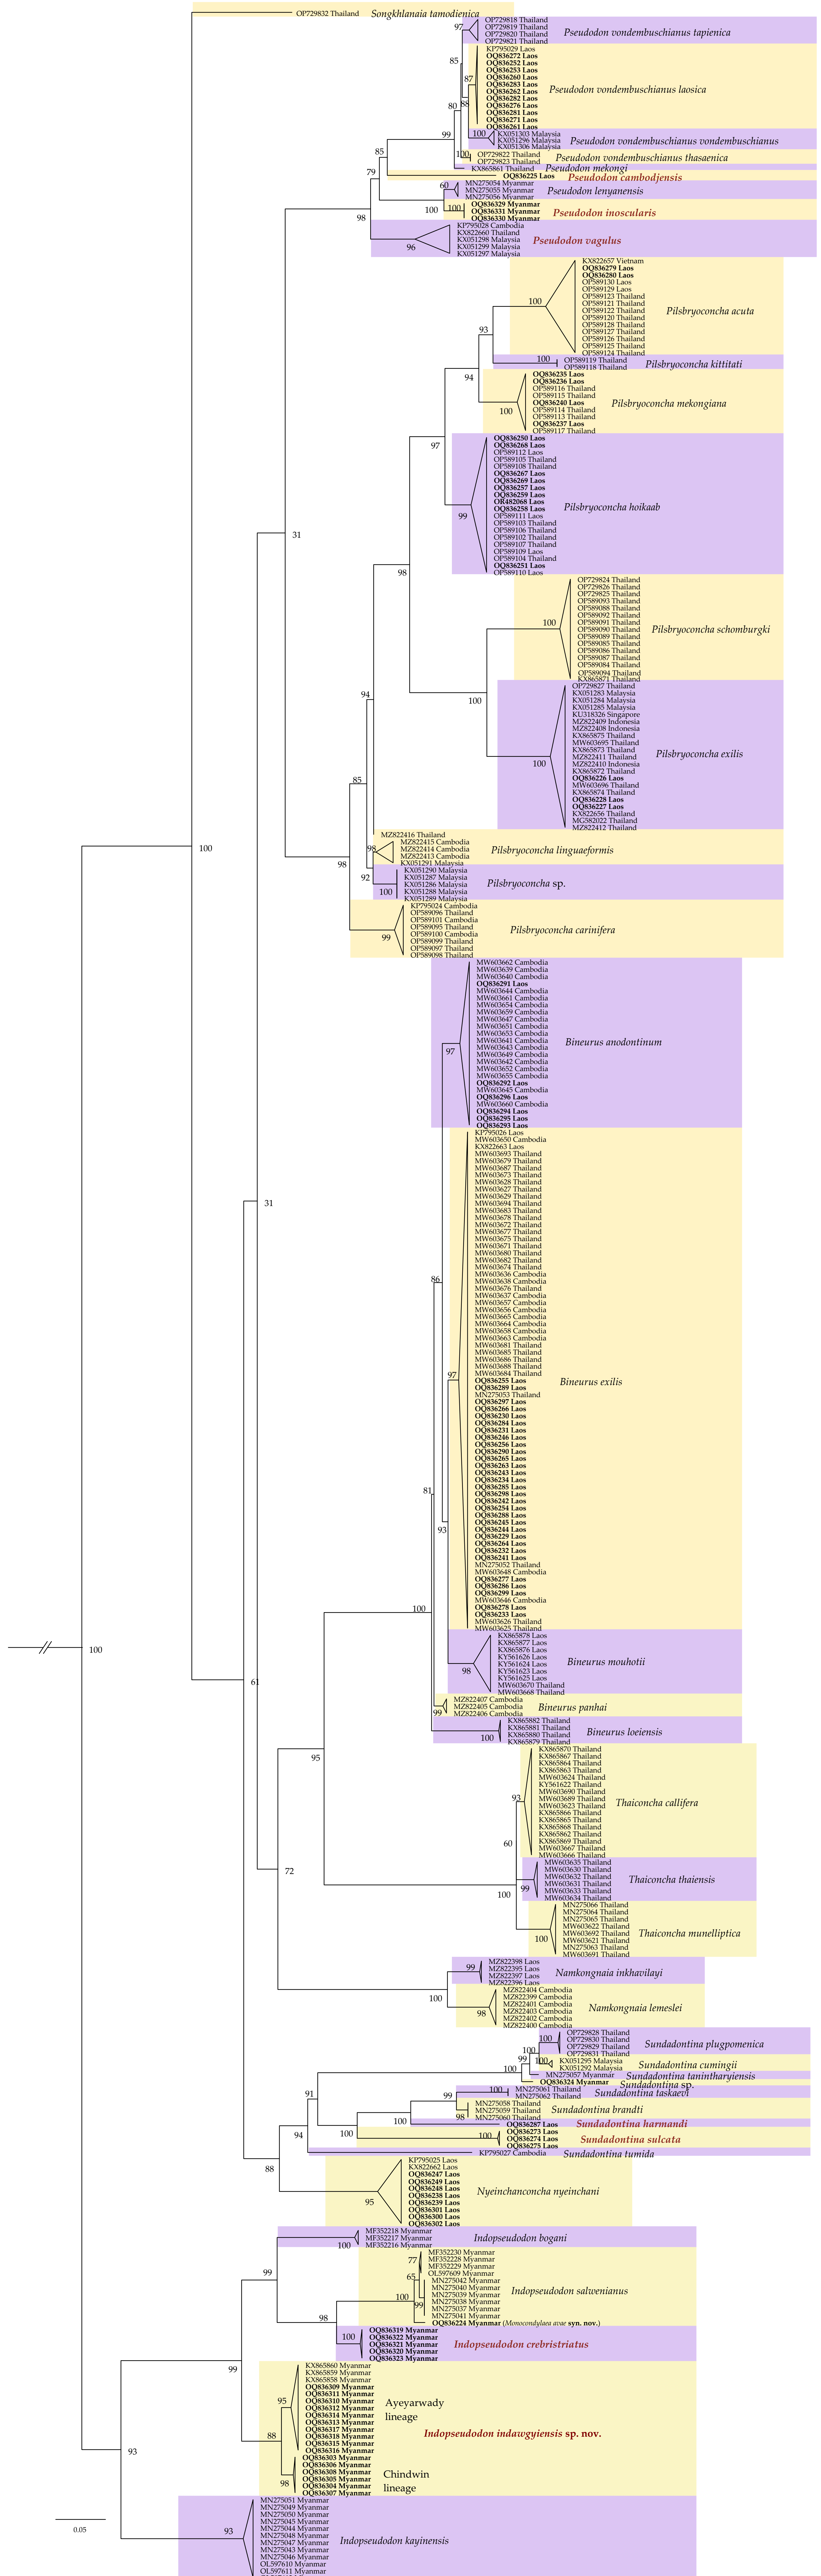

**Figure S2.** Maximum likelihood phylogeny of the mitochondrial data set (three codons of *COI*) of the Pseudodontini. New and little-known taxa discussed in this study are marked by red color. Numbers of new sequences are bold. Scale bar indicates the branch lengths. Black numbers near nodes are ultrafast bootstrap support values of IQ-TREE v1.6.12. Outgroup taxa are not shown.
