# Supplementary material
Source: MDPI journal article supplement (https://www.mdpi.com/2073-4441/15/17/3117)
Supplement: s1 [file s1]

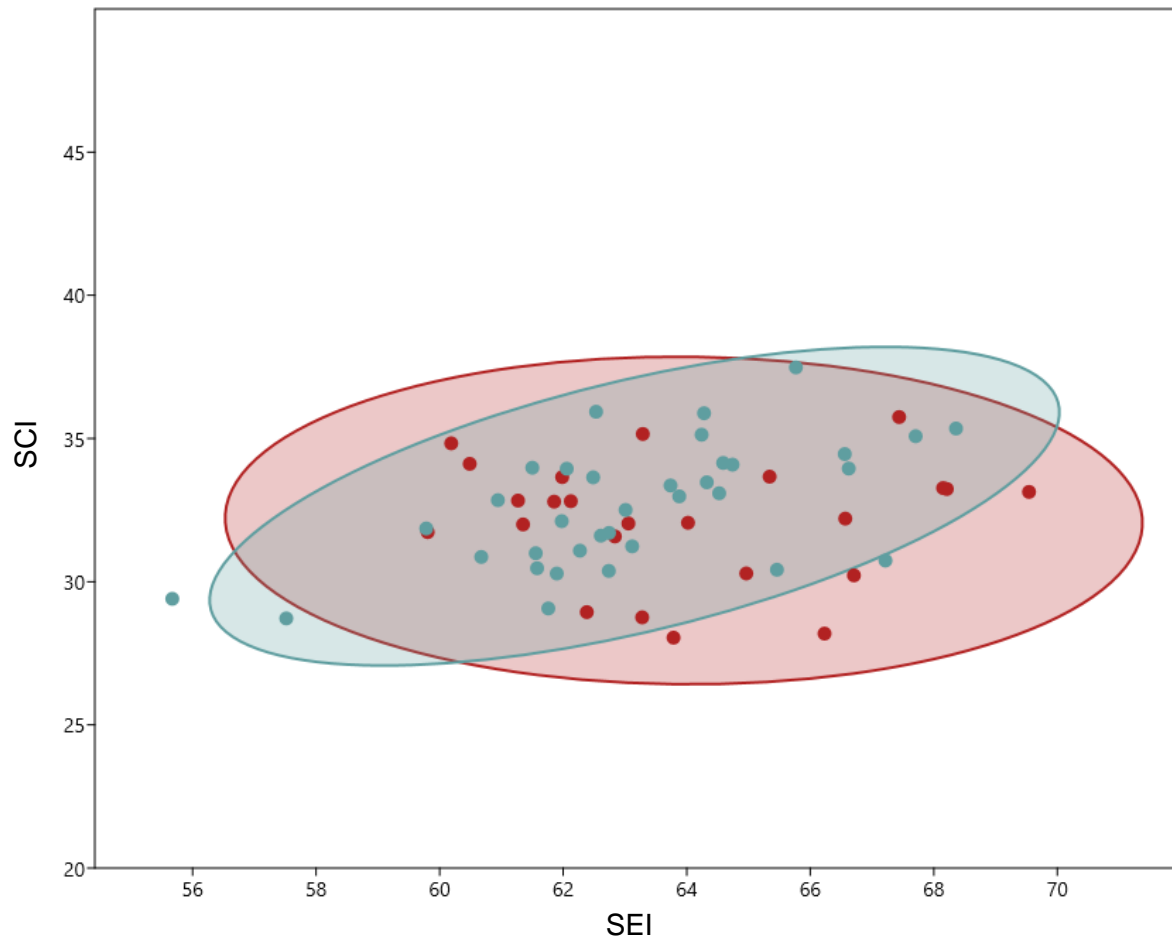

**Figure S3.** Shell proportions of two lineages of *Indopseudodon indawgyiensis* **sp. nov.** based on the shell elongation index (SEI) and the shell convexity index (SCI). Chindwin lineage (CL) and Ayeyarwady lineage (AL) are marked by red and turquoise color, respectively. The bold lines show 95% confidence ellipses.
