# Supplementary material
Source: MDPI journal article supplement (https://www.mdpi.com/2073-4441/15/17/3117)
Supplement: s1 [file s1]

**Table S1.** Relative probability of biogeographic models calculated for the tribe Pseudodontini

| Model       | <i>LnL</i> | Number of parameters | <i>d</i> | <i>e</i> | Second-order Akaike Information Criterion (AICc) | Model weight according to $\Delta AICc$ (AICc wt) |
|-------------|------------|----------------------|----------|----------|--------------------------------------------------|---------------------------------------------------|
| DEC         | -10.17     | 2                    | 0.0006   | 1.00E-12 | 24.63                                            | 0.40                                              |
| DIVALIKE*   | -9.76      | 2                    | 0.0015   | 1.00E-12 | 23.81                                            | 0.60                                              |
| BAYAREALIKE | -21.76     | 2                    | 0.0014   | 0.0019   | 47.81                                            | 3.70E-06                                          |

\*The most probable model based on the highest AICc wt value.
