# Supplementary material
Source: MDPI journal article supplement (https://www.mdpi.com/2073-4441/15/17/3117)
Supplement: s1 [file s1]

**Table S4.** Genetic divergences (mean uncorrected COI p-distances, %) between *Indopseudodon indawgyiensis* **sp. nov.** and its congeners

| Species                                    | <i>I. indawgyiensis</i> <b>sp. nov.</b> | <i>I. bogani</i> <b>comb. nov.</b> | <i>I. kayinensis</i> <b>comb. nov.</b> | <i>I. salwenianus</i> <b>comb. rev.</b> |
|--------------------------------------------|-----------------------------------------|------------------------------------|----------------------------------------|-----------------------------------------|
| <i>I. bogani</i> <b>comb. nov.</b>         | 8.1 ± 1.0                               |                                    |                                        |                                         |
| <i>I. kayinensis</i> <b>comb. nov.</b>     | 11.3 ± 1.2                              | 11.4 ± 1.2                         |                                        |                                         |
| <i>I. salwenianus</i> <b>comb. rev.</b>    | 9.5 ± 1.1                               | 10.0 ± 1.1                         | 13.3 ± 1.3                             |                                         |
| <i>I. crebristriatus</i> <b>comb. nov.</b> | 8.4 ± 1.0                               | 7.5 ± 1.0                          | 11.7 ± 1.2                             | 6.5 ± 0.9                               |
