# Supplementary material
Source: MDPI journal article supplement (https://www.mdpi.com/2073-4441/15/17/3117)
Supplement: s1 [file s1]

**Table S2.** Mean ages with 95% highest posterior densities (HPD), Bayesian posterior probabilities (BPP), and the most probable ancestral areas of the primary clades within Pseudodontini inferred from DIVALIKE model

| Clades                                                    | Mean age (Ma) | 95% HPD (Ma) | BPP  | Ancestral areas             | Type of biogeographic events | Probability of ancestral areas based on the DIVALIKE model (%) |
|-----------------------------------------------------------|---------------|--------------|------|-----------------------------|------------------------------|----------------------------------------------------------------|
| Tribe Pseudodontini                                       | 91.0          | 82.5-99.4    | 1.00 | Sunda Plate                 | Dispersal                    | 66.7                                                           |
| Subtribe Pseudodontina                                    | 74.5          | 68.4-81.0    | 1.00 | Sunda Plate                 | Intra-area radiation         | 100.0                                                          |
| Subtribe Indopseudodontina                                | 52.4          | 40.3-56.3    | 1.00 | Sunda Plate + Burma Terrane | Vicariance                   | 99.9                                                           |
| <i>Indopseudodon</i> species without <i>I. kayinensis</i> | 33.4          | 28.0-38.8    | 1.00 | Burma Terrane               | Intra-area radiation         | 99.9                                                           |

**Table S3.** Shell measurements and shell indexes of *Indopseudodon indawgyiensis* **sp. nov.**

| Status of Specimen             | Specimen Voucher | Shell Length (mm) | Shell Height (mm) | Shell Width (mm) | SEI   | SCI   |
|--------------------------------|------------------|-------------------|-------------------|------------------|-------|-------|
| <b>Ayeyarwady lineage (AL)</b> |                  |                   |                   |                  |       |       |
| Holotype                       | RMBH biv 110/1   | 69.07             | 43.01             | 21.47            | 62.27 | 31.08 |
| Paratype                       | RMBH biv 110/2   | 78.56             | 50.86             | 26.78            | 64.74 | 34.09 |
| Paratype                       | RMBH biv 110/3   | 65.78             | 43.06             | 20.01            | 65.46 | 30.42 |
| Paratype                       | RMBH biv 110/4   | 57.42             | 37.05             | 19.00            | 64.52 | 33.09 |
| Paratype                       | RMBH biv 110/5   | 67.77             | 45.15             | 23.01            | 66.62 | 33.95 |
| Paratype                       | RMBH biv 110/6   | 55.79             | 37.50             | 17.15            | 67.22 | 30.74 |
| Paratype                       | RMBH biv 110/10  | 74.44             | 48.08             | 25.42            | 64.59 | 34.15 |
| Paratype                       | RMBH biv 110/11  | 77.01             | 48.12             | 25.91            | 62.49 | 33.64 |
| Paratype                       | RMBH biv 110/12  | 73.46             | 47.22             | 26.36            | 64.28 | 35.88 |
| Paratype                       | RMBH biv 110/13  | 76.75             | 48.36             | 24.95            | 63.01 | 32.51 |
| Paratype                       | RMBH biv 110/14  | 72.28             | 49.41             | 25.55            | 68.36 | 35.35 |
| Paratype                       | RMBH biv 925/1   | 51.13             | 32.08             | 16.21            | 62.74 | 31.70 |
| Paratype                       | RMBH biv 925/2   | 69.82             | 38.87             | 20.53            | 55.67 | 29.40 |
| Paratype                       | RMBH biv 925/3   | 63.44             | 39.18             | 18.44            | 61.76 | 29.07 |
| Paratype                       | RMBH biv 925/4   | 64.41             | 39.08             | 19.88            | 60.67 | 30.86 |
| Paratype                       | RMBH biv 925/5   | 62.02             | 38.91             | 18.84            | 62.74 | 30.38 |
| Paratype                       | RMBH biv 925/6   | 52.75             | 30.34             | 15.15            | 57.52 | 28.72 |
| Paratype                       | RMBH biv 936/1   | 76.71             | 45.86             | 24.44            | 59.78 | 31.86 |
| Paratype                       | RMBH biv 936/2   | 65.48             | 40.27             | 22.25            | 61.50 | 33.98 |
| Paratype                       | RMBH biv 936/3   | 64.11             | 39.07             | 21.06            | 60.94 | 32.85 |
| Paratype                       | RMBH biv 936/4   | 57.66             | 37.09             | 19.30            | 64.33 | 33.47 |
| Paratype                       | RMBH biv 936/5   | 52.09             | 34.67             | 17.95            | 66.56 | 34.46 |
| Paratype                       | RMBH biv 936/6   | 55.77             | 35.20             | 17.42            | 63.12 | 31.24 |
| Paratype                       | RMBH biv 936/7   | 50.33             | 32.15             | 16.60            | 63.88 | 32.98 |
| Paratype                       | RMBH biv 936/8   | 56.03             | 35.08             | 17.71            | 62.61 | 31.61 |
| Paratype                       | RMBH biv 936/9   | 62.39             | 40.08             | 21.92            | 64.24 | 35.13 |
| Paratype                       | RMBH biv 936/10  | 63.85             | 43.23             | 22.40            | 67.71 | 35.08 |
| Paratype                       | RMBH biv 936/11  | 69.30             | 44.17             | 23.12            | 63.74 | 33.36 |
| Paratype                       | RMBH biv 936/12  | 71.82             | 44.57             | 24.38            | 62.06 | 33.95 |
| Paratype                       | RMBH biv 936/13  | 70.23             | 43.47             | 21.27            | 61.90 | 30.29 |
| Paratype                       | RMBH biv 936/14  | 75.72             | 46.61             | 23.47            | 61.56 | 31.00 |
| Paratype                       | RMBH biv 947/1   | 88.34             | 54.75             | 28.37            | 61.98 | 32.11 |
| Paratype                       | RMBH biv 947/2   | 60.12             | 37.02             | 18.32            | 61.58 | 30.47 |
| Paratype                       | RMBH biv 955/1   | 63.36             | 41.67             | 23.75            | 65.77 | 37.48 |
| Paratype                       | RMBH biv 955/2   | 51.51             | 32.21             | 18.51            | 62.53 | 35.93 |
| <b>Chindwin lineage (CL)</b>   |                  |                   |                   |                  |       |       |
| Paratype                       | RMBH biv 896/1   | 78.71             | 51.43             | 26.50            | 65.34 | 33.67 |
| Paratype                       | RMBH biv 896/2   | 67.96             | 47.26             | 22.52            | 69.54 | 33.14 |
| Paratype                       | RMBH biv 896/3   | 60.44             | 41.19             | 20.11            | 68.15 | 33.27 |
| Paratype                       | RMBH biv 896/4   | 51.53             | 32.99             | 16.52            | 64.02 | 32.06 |
| Paratype                       | RMBH biv 896/5   | 44.21             | 28.20             | 12.40            | 63.79 | 28.05 |
| Paratype                       | RMBH biv 896/6   | 63.05             | 42.52             | 22.54            | 67.44 | 35.75 |
| Paratype                       | RMBH biv 896/7   | 60.27             | 40.12             | 19.41            | 66.57 | 32.21 |
| Paratype                       | RMBH biv 896/8   | 60.02             | 40.94             | 19.95            | 68.21 | 33.24 |
| Paratype                       | RMBH biv 896/9   | 49.47             | 33.00             | 14.95            | 66.71 | 30.22 |

|          |                 |       |       |       |       |       |
|----------|-----------------|-------|-------|-------|-------|-------|
| Paratype | RMBH biv 896/10 | 48.20 | 30.50 | 13.86 | 63.28 | 28.76 |
| Paratype | RMBH biv 896/11 | 41.50 | 26.96 | 12.57 | 64.96 | 30.29 |
| Paratype | RMBH biv 896/12 | 42.82 | 28.36 | 12.07 | 66.23 | 28.19 |
| Paratype | RMBH biv 896/13 | 36.18 | 22.57 | 10.47 | 62.38 | 28.94 |
| Paratype | RMBH biv 906/1  | 58.02 | 36.72 | 20.40 | 63.29 | 35.16 |
| Paratype | RMBH biv 906/2  | 57.88 | 36.37 | 18.28 | 62.84 | 31.58 |
| Paratype | RMBH biv 906/3  | 49.34 | 30.23 | 16.20 | 61.27 | 32.83 |
| Paratype | RMBH biv 906/4  | 49.30 | 29.82 | 16.82 | 60.49 | 34.12 |
| Paratype | RMBH biv 906/5  | 49.16 | 30.54 | 16.13 | 62.12 | 32.81 |
| Paratype | RMBH biv 906/6  | 46.98 | 29.12 | 15.81 | 61.98 | 33.65 |
| Paratype | RMBH biv 906/7  | 53.16 | 33.52 | 17.03 | 63.05 | 32.04 |
| Paratype | RMBH biv 906/8  | 49.18 | 29.60 | 17.13 | 60.19 | 34.83 |
| Paratype | RMBH biv 906/9  | 49.78 | 30.54 | 15.93 | 61.35 | 32.00 |
| Paratype | RMBH biv 906/10 | 50.83 | 31.44 | 16.67 | 61.85 | 32.80 |
| Paratype | RMBH biv 906/11 | 48.34 | 28.91 | 15.34 | 59.81 | 31.73 |

**Table S4.** Genetic divergences (mean uncorrected p-distances, %) from *Indopseudodon indawgyiensis* **sp. nov.** and its congeners based on the mitochondrial *COI* gene sequences.

| Species                  | <i>I. indawgyiensis</i> <b>sp. nov.</b> | <i>I. bogani</i> | <i>I. kayinensis</i> | <i>I. salweenianus</i> |
|--------------------------|-----------------------------------------|------------------|----------------------|------------------------|
| <i>I. bogani</i>         | 8.1±1.0                                 |                  |                      |                        |
| <i>I. kayinensis</i>     | 11.3±1.2                                | 11.4±1.2         |                      |                        |
| <i>I. salweenianus</i>   | 9.5±1.1                                 | 10.0±1.1         | 13.3±1.3             |                        |
| <i>I. crebristriatus</i> | 8.4±1.0                                 | 7.5±1.0          | 11.7±1.2             | 6.5±0.9                |

## Supplementary datasets

**Dataset S1.** Information on DNA sequences of freshwater mussels (Unionidae) used to reconstruct multi-locus phylogenies (one haplotype per species) [separate Excel file].

**Dataset S2.** Information on new DNA sequences of Pseudodontina species from Myanmar and Laos generated in this study [separate Excel file].

**Dataset S3.** Information on DNA sequences of *Indopseudodon* species used in this study [separate Excel file].

**Dataset S4.** Occurrences of *Indopseudodon* species and *Pseudodon inoscularis* [separate Excel file].
