# Supplementary material
Source: MDPI journal article supplement (https://www.mdpi.com/2073-4441/15/17/3117)
Supplement: s1 [file s1]

**Table S3.** Shell measurements and shell indexes of the type series of *Indopseudodon indawgyiensis* sp. nov.

| Status of Specimen | Specimen Voucher | Genetic Lineage | Shell Length (mm) | Shell Height (mm) | Shell Width (mm) | SEI  | SCI  |
|--------------------|------------------|-----------------|-------------------|-------------------|------------------|------|------|
| Holotype           | RMBH biv 110/1   | Ayeyarwady (AL) | 69.1              | 43.0              | 21.5             | 62.3 | 31.1 |
| Paratype           | RMBH biv 110/2   | Ayeyarwady (AL) | 78.6              | 50.9              | 26.8             | 64.7 | 34.1 |
| Paratype           | RMBH biv 110/3   | Ayeyarwady (AL) | 65.8              | 43.1              | 20.0             | 65.5 | 30.4 |
| Paratype           | RMBH biv 110/4   | Ayeyarwady (AL) | 57.4              | 37.1              | 19.0             | 64.5 | 33.1 |
| Paratype           | RMBH biv 110/5   | Ayeyarwady (AL) | 67.8              | 45.2              | 23.0             | 66.6 | 34.0 |
| Paratype           | RMBH biv 110/6   | Ayeyarwady (AL) | 55.8              | 37.5              | 17.2             | 67.2 | 30.7 |
| Paratype           | RMBH biv 110/10  | Ayeyarwady (AL) | 74.4              | 48.1              | 25.4             | 64.6 | 34.2 |
| Paratype           | RMBH biv 110/11  | Ayeyarwady (AL) | 77.0              | 48.1              | 25.9             | 62.5 | 33.6 |
| Paratype           | RMBH biv 110/12  | Ayeyarwady (AL) | 73.5              | 47.2              | 26.4             | 64.3 | 35.9 |
| Paratype           | RMBH biv 110/13  | Ayeyarwady (AL) | 76.8              | 48.4              | 25.0             | 63.0 | 32.5 |
| Paratype           | RMBH biv 110/14  | Ayeyarwady (AL) | 72.3              | 49.4              | 25.6             | 68.4 | 35.4 |
| Paratype           | RMBH biv 925/1   | Ayeyarwady (AL) | 51.1              | 32.1              | 16.2             | 62.7 | 31.7 |
| Paratype           | RMBH biv 925/2   | Ayeyarwady (AL) | 69.8              | 38.9              | 20.5             | 55.7 | 29.4 |
| Paratype           | RMBH biv 925/3   | Ayeyarwady (AL) | 63.4              | 39.2              | 18.4             | 61.8 | 29.1 |
| Paratype           | RMBH biv 925/4   | Ayeyarwady (AL) | 64.4              | 39.1              | 19.9             | 60.7 | 30.9 |
| Paratype           | RMBH biv 925/5   | Ayeyarwady (AL) | 62.0              | 38.9              | 18.8             | 62.7 | 30.4 |
| Paratype           | RMBH biv 925/6   | Ayeyarwady (AL) | 52.8              | 30.3              | 15.2             | 57.5 | 28.7 |
| Paratype           | RMBH biv 936/1   | Ayeyarwady (AL) | 76.7              | 45.9              | 24.4             | 59.8 | 31.9 |
| Paratype           | RMBH biv 936/2   | Ayeyarwady (AL) | 65.5              | 40.3              | 22.3             | 61.5 | 34.0 |
| Paratype           | RMBH biv 936/3   | Ayeyarwady (AL) | 64.1              | 39.1              | 21.1             | 60.9 | 32.9 |
| Paratype           | RMBH biv 936/4   | Ayeyarwady (AL) | 57.7              | 37.1              | 19.3             | 64.3 | 33.5 |
| Paratype           | RMBH biv 936/5   | Ayeyarwady (AL) | 52.1              | 34.7              | 18.0             | 66.6 | 34.5 |
| Paratype           | RMBH biv 936/6   | Ayeyarwady (AL) | 55.8              | 35.2              | 17.4             | 63.1 | 31.2 |
| Paratype           | RMBH biv 936/7   | Ayeyarwady (AL) | 50.3              | 32.2              | 16.6             | 63.9 | 33.0 |
| Paratype           | RMBH biv 936/8   | Ayeyarwady (AL) | 56.0              | 35.1              | 17.7             | 62.6 | 31.6 |
| Paratype           | RMBH biv 936/9   | Ayeyarwady (AL) | 62.4              | 40.1              | 21.9             | 64.2 | 35.1 |
| Paratype           | RMBH biv 936/10  | Ayeyarwady (AL) | 63.9              | 43.2              | 22.4             | 67.7 | 35.1 |
| Paratype           | RMBH biv 936/11  | Ayeyarwady (AL) | 69.3              | 44.2              | 23.1             | 63.7 | 33.4 |
| Paratype           | RMBH biv 936/12  | Ayeyarwady (AL) | 71.8              | 44.6              | 24.4             | 62.1 | 34.0 |
| Paratype           | RMBH biv 936/13  | Ayeyarwady (AL) | 70.2              | 43.5              | 21.3             | 61.9 | 30.3 |
| Paratype           | RMBH biv 936/14  | Ayeyarwady (AL) | 75.7              | 46.6              | 23.5             | 61.6 | 31.0 |
| Paratype           | RMBH biv 947/1   | Ayeyarwady (AL) | 88.3              | 54.8              | 28.4             | 62.0 | 32.1 |
| Paratype           | RMBH biv 947/2   | Ayeyarwady (AL) | 60.1              | 37.0              | 18.3             | 61.6 | 30.5 |
| Paratype           | RMBH biv 955/1   | Ayeyarwady (AL) | 63.4              | 41.7              | 23.8             | 65.8 | 37.5 |
| Paratype           | RMBH biv 955/2   | Ayeyarwady (AL) | 51.5              | 32.2              | 18.5             | 62.5 | 35.9 |
| Paratype           | RMBH biv 896/1   | Chindwin (CL)   | 78.7              | 51.4              | 26.5             | 65.3 | 33.7 |
| Paratype           | RMBH biv 896/2   | Chindwin (CL)   | 68.0              | 47.3              | 22.5             | 69.5 | 33.1 |
| Paratype           | RMBH biv 896/3   | Chindwin (CL)   | 60.4              | 41.2              | 20.1             | 68.2 | 33.3 |
| Paratype           | RMBH biv 896/4   | Chindwin (CL)   | 51.5              | 33.0              | 16.5             | 64.0 | 32.1 |
| Paratype           | RMBH biv 896/5   | Chindwin (CL)   | 44.2              | 28.2              | 12.4             | 63.8 | 28.1 |
| Paratype           | RMBH biv 896/6   | Chindwin (CL)   | 63.1              | 42.5              | 22.5             | 67.4 | 35.8 |
| Paratype           | RMBH biv 896/7   | Chindwin (CL)   | 60.3              | 40.1              | 19.4             | 66.6 | 32.2 |

| Status of Specimen | Specimen Voucher | Genetic Lineage | Shell Length (mm) | Shell Height (mm) | Shell Width (mm) | SEI  | SCI  |
|--------------------|------------------|-----------------|-------------------|-------------------|------------------|------|------|
| Paratype           | RMBH biv 896/8   | Chindwin (CL)   | 60.0              | 40.9              | 20.0             | 68.2 | 33.2 |
| Paratype           | RMBH biv 896/9   | Chindwin (CL)   | 49.5              | 33.0              | 15.0             | 66.7 | 30.2 |
| Paratype           | RMBH biv 896/10  | Chindwin (CL)   | 48.2              | 30.5              | 13.9             | 63.3 | 28.8 |
| Paratype           | RMBH biv 896/11  | Chindwin (CL)   | 41.5              | 27.0              | 12.6             | 65.0 | 30.3 |
| Paratype           | RMBH biv 896/12  | Chindwin (CL)   | 42.8              | 28.4              | 12.1             | 66.2 | 28.2 |
| Paratype           | RMBH biv 896/13  | Chindwin (CL)   | 36.2              | 22.6              | 10.5             | 62.4 | 28.9 |
| Paratype           | RMBH biv 906/1   | Chindwin (CL)   | 58.0              | 36.7              | 20.4             | 63.3 | 35.2 |
| Paratype           | RMBH biv 906/2   | Chindwin (CL)   | 57.9              | 36.4              | 18.3             | 62.8 | 31.6 |
| Paratype           | RMBH biv 906/3   | Chindwin (CL)   | 49.3              | 30.2              | 16.2             | 61.3 | 32.8 |
| Paratype           | RMBH biv 906/4   | Chindwin (CL)   | 49.3              | 29.8              | 16.8             | 60.5 | 34.1 |
| Paratype           | RMBH biv 906/5   | Chindwin (CL)   | 49.2              | 30.5              | 16.1             | 62.1 | 32.8 |
| Paratype           | RMBH biv 906/6   | Chindwin (CL)   | 47.0              | 29.1              | 15.8             | 62.0 | 33.7 |
| Paratype           | RMBH biv 906/7   | Chindwin (CL)   | 53.2              | 33.5              | 17.0             | 63.1 | 32.0 |
| Paratype           | RMBH biv 906/8   | Chindwin (CL)   | 49.2              | 29.6              | 17.1             | 60.2 | 34.8 |
| Paratype           | RMBH biv 906/9   | Chindwin (CL)   | 49.8              | 30.5              | 15.9             | 61.4 | 32.0 |
| Paratype           | RMBH biv 906/10  | Chindwin (CL)   | 50.8              | 31.4              | 16.7             | 61.9 | 32.8 |
| Paratype           | RMBH biv 906/11  | Chindwin (CL)   | 48.3              | 28.9              | 15.3             | 59.8 | 31.7 |
