# Supplementary material
Source: MDPI journal article supplement (https://www.mdpi.com/2073-4441/15/17/3117)
Supplement: s1 [file s1]

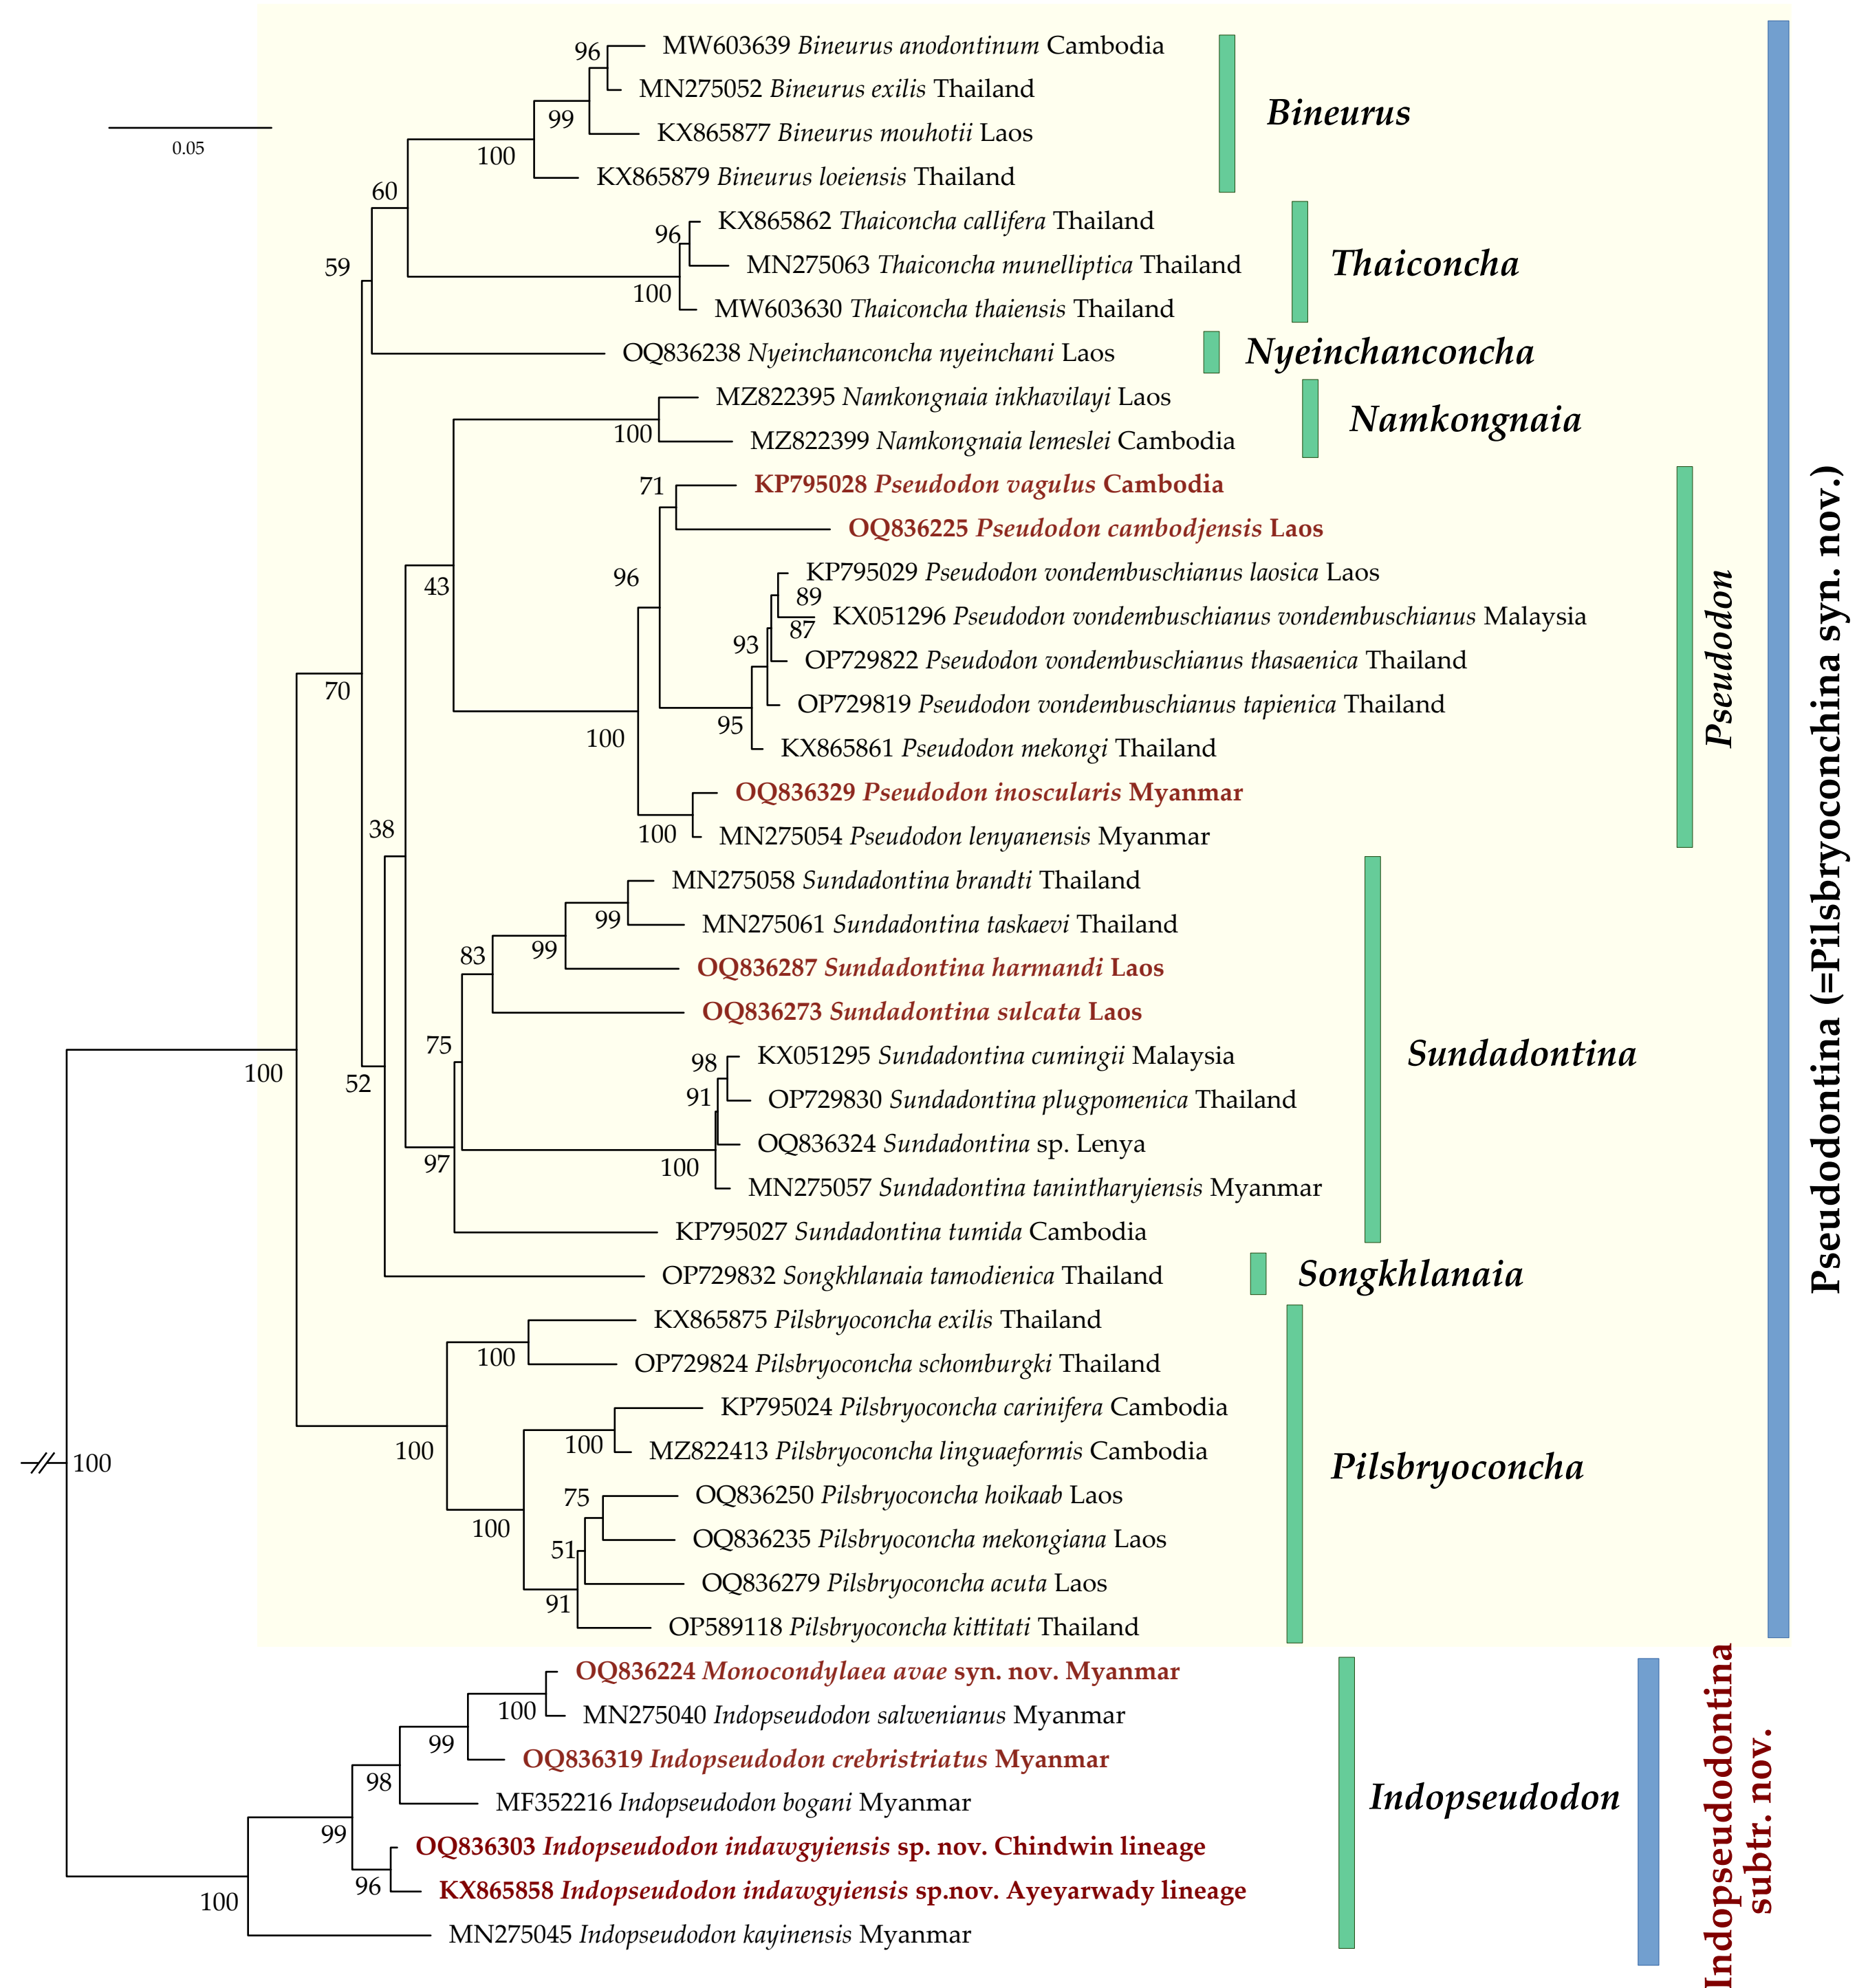

**Figure S1.** Multi-locus maximum likelihood phylogeny of the tribe Pseudodontini (COI + 16S rRNA + 28S rRNA gene fragments; see Dataset S1 for detail). Scale bar indicates the branch lengths. Black numbers near nodes are ultrafast bootstrap support values of IQ-TREE v1.6.12. New and little-known taxa discussed in this study are marked by red color. Outgroup taxa are not shown.
